# Supplementary material for: Diverse phenotypes of Late Glacial–Early Holocene downy birch (Betula pubescens Erh.) and the morphology of early Preboreal tree stands in southern Schleswig-Holstein
Source: Copernicus journal article supplement (doi:10.5194/egqsj-73-23-2024), 2024-01-18
Supplement: Supplementary file 1 [file egqsj-73-23-2024-supplement.pdf]

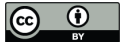

*Supplement of*

**Diverse phenotypes of Late Glacial–Early Holocene downy birch  
(*Betula pubescens* Erh.) and the morphology of early Preboreal  
tree stands in southern Schleswig-Holstein**

**Sascha Krüger**

*Correspondence to:* Sascha Krüger (sas@natmus.dk)

The copyright of individual parts of the supplement might differ from the article licence.

## Supplementary material

Macrofossil data by Hartmut Usinger is provided in table S1-S5.

|                       |   |                          |
|-----------------------|---|--------------------------|
| Location Hasenmoor    | - | N 54.312108, E 9.934099  |
| Location Kirchmoor    | - | N 54.223851, E 10.064958 |
| Location Krögensmoor  | - | N 54.407600, E 9.888869  |
| Location Ruchmoor     | - | N 54.415852, E 9.719514  |
| Location Stauner Moor | - | N 54.413441, E 10.049310 |

In each individual case the depth refers to depth below the bog surface. The age estimate is based on pollen stratigraphy and refers to regional biostratigraphic terms (Krüger et al., 2020).

Legend to the macrofossils schedules:

|         |                                                |
|---------|------------------------------------------------|
| MEI/D1  | - (biostratigraphic) Meiendorf/ Dryas 1 period |
| AL      | - (biostratigraphic) Allerød period            |
| D3      | - (biostratigraphic) Dryas 3 period            |
| PB      | - (biostratigraphic) Preboreal period          |
| BO      | - (biostratigraphic) Boreal period             |
| AT      | - (biostratigraphic) Atlantic period           |
| SB      | - (biostratigraphic) Subboreal period          |
| postgl. | - postglacial period (undefined)               |
| x       | - macrofossil present (unquantified)           |
| p       | - macrofossil present (semi-quantified)        |
| a       | - macrofossil abundant (semi-quantified)       |

**table S1**  
**Hasenmoor**

|        | pollen zone | depta (cm) | Selaginella selaginoides | Dryas octopetala | Salix polaris | Hippopae rhamnoides | Betula nana | Betula pubescens | Betula alba | Populus tremula | Pinus sylvestris | Potamogeton filiformis | Potamogeton berchtoldii | Potamogeton obtusifolius | Potamogeton natans | Potamogeton sp. | Batrachium | Nymphaeae | Typha sp. | Alismataceae | Equisetum fluviatile | Thelypteris palustris | Catocarpium nigrum | Distichium capillaceum | Fontinalis antipyretica | Drepanocladus fluitans | Drepanocladus sp. | Calliergon stramineum | Amblystegiaceae | Polytrichum juniperinum | Sphagnum sp. | Polygonum sp. | Carex sp. | Juncus sp. |   |   |   |  |  |
|--------|-------------|------------|--------------------------|------------------|---------------|---------------------|-------------|------------------|-------------|-----------------|------------------|------------------------|-------------------------|--------------------------|--------------------|-----------------|------------|-----------|-----------|--------------|----------------------|-----------------------|--------------------|------------------------|-------------------------|------------------------|-------------------|-----------------------|-----------------|-------------------------|--------------|---------------|-----------|------------|---|---|---|--|--|
| SB     | 365         |            |                          |                  |               |                     |             | 1 p              |             |                 |                  |                        |                         |                          | 22 p               |                 | a          |           |           |              | p                    |                       |                    | p                      | p                       |                        | p                 |                       | p               |                         |              |               |           | 1          |   |   |   |  |  |
| SB     | 385         |            |                          |                  |               |                     |             | p                |             |                 |                  |                        |                         |                          | p                  |                 | a          |           |           |              |                      | p                     |                    |                        | p                       | p                      |                   | p                     |                 | p                       |              |               |           |            | 1 |   |   |  |  |
| SB     | 430         |            |                          |                  |               |                     |             | p                |             |                 |                  |                        |                         |                          |                    |                 | p          | p         |           |              |                      |                       |                    |                        |                         |                        |                   |                       |                 |                         |              |               |           |            |   |   |   |  |  |
| SB     | 480         |            |                          |                  |               |                     |             | 1 a              |             |                 |                  |                        |                         |                          |                    |                 | p          |           | 1 p       |              |                      |                       |                    | p                      |                         |                        |                   |                       |                 | a                       |              |               | p         |            | p |   |   |  |  |
| SB     | 530         |            |                          |                  |               |                     |             | p                |             |                 |                  |                        |                         |                          |                    |                 | p          |           |           |              |                      |                       |                    |                        |                         |                        |                   |                       |                 | p                       |              |               |           |            |   |   |   |  |  |
| AT     | 580         |            |                          |                  |               |                     |             | p                |             | 1               |                  |                        |                         |                          |                    | p               |            |           |           |              |                      |                       |                    |                        | p                       |                        |                   |                       | p               |                         |              |               |           |            |   |   |   |  |  |
| AT     | 630         |            |                          |                  |               |                     | a           | p                |             | p               |                  |                        |                         |                          |                    |                 | p          |           |           |              |                      |                       |                    |                        |                         |                        |                   |                       |                 | p                       |              |               |           |            |   |   |   |  |  |
| BO     | 680         |            |                          |                  |               |                     |             |                  | 6           | 1 p             |                  |                        | 60                      |                          |                    | p               |            | p         | p         |              |                      |                       |                    |                        |                         |                        |                   |                       |                 |                         |              |               |           |            |   |   |   |  |  |
| PB     | 730         |            |                          |                  |               |                     |             | a                | p           | p               |                  | 12                     | 1                       |                          |                    |                 | p          |           |           |              | a                    |                       |                    | p                      |                         |                        |                   |                       |                 |                         |              |               |           | p          |   |   |   |  |  |
| PB     | 755         |            |                          |                  |               |                     | a           | 4                | 1           |                 |                  |                        |                         |                          |                    | p               |            |           |           |              |                      |                       |                    |                        |                         |                        |                   |                       |                 |                         |              |               |           |            |   |   |   |  |  |
| D3     | 780         |            |                          |                  |               |                     |             | 5                |             |                 |                  | 1                      |                         |                          |                    | a               |            |           |           |              |                      |                       |                    |                        | a                       |                        |                   |                       |                 |                         |              |               |           |            |   | 1 |   |  |  |
| D3     | 819         |            |                          |                  |               |                     |             | 11               |             |                 |                  |                        |                         |                          |                    | p               | p          |           |           |              |                      |                       |                    |                        |                         |                        |                   |                       |                 |                         |              |               |           |            |   |   |   |  |  |
| AL     | 830         |            |                          |                  |               |                     |             | a                | 1           |                 |                  |                        |                         |                          |                    | a               |            |           |           |              |                      |                       |                    |                        |                         |                        |                   |                       |                 |                         |              |               |           |            |   |   |   |  |  |
| AL     | 841         |            |                          |                  |               |                     | a           |                  |             |                 |                  |                        |                         |                          |                    |                 |            |           |           |              |                      |                       |                    |                        |                         |                        |                   |                       |                 |                         |              |               |           |            |   |   |   |  |  |
| AL     | 851         | 1          |                          |                  | 5             |                     | 2           |                  |             |                 |                  | 3                      |                         |                          |                    | p               |            |           |           |              |                      |                       |                    |                        | a                       |                        |                   |                       |                 |                         |              |               |           |            |   |   |   |  |  |
| MEI/D1 | 858         |            | 2                        |                  | 5             |                     | 1           |                  |             |                 |                  | p                      |                         |                          |                    |                 |            |           |           |              |                      |                       |                    | p                      | a                       |                        |                   |                       |                 |                         |              |               |           |            |   |   |   |  |  |
| MEI/D1 | 863         |            | 1                        |                  |               | p                   |             |                  |             |                 |                  |                        |                         |                          |                    | p               |            |           |           |              |                      |                       |                    |                        | p                       |                        | p                 |                       |                 |                         |              |               |           |            |   |   |   |  |  |
| MEI/D1 | 868         |            | 3                        |                  |               |                     |             |                  |             |                 |                  |                        |                         |                          |                    |                 |            |           |           |              |                      |                       |                    | p                      | p                       |                        | p                 |                       |                 |                         |              |               |           |            |   |   | 1 |  |  |
| MEI/D1 | 873         |            | 3                        |                  |               |                     |             |                  |             |                 |                  |                        |                         |                          |                    |                 |            |           |           |              |                      |                       |                    |                        | p                       |                        |                   |                       |                 |                         |              |               |           |            |   |   |   |  |  |
| MEI/D1 | 878         | 1          | 2                        | 3                |               |                     |             |                  |             |                 |                  |                        |                         |                          |                    | p               |            |           |           |              |                      |                       |                    | p                      | a                       |                        |                   |                       |                 |                         |              |               |           | 1          | 1 |   |   |  |  |
| MEI/D1 | 883         |            | 2                        |                  |               |                     |             |                  |             |                 |                  | 2                      |                         |                          |                    |                 |            |           |           |              |                      |                       |                    | p                      | a                       |                        |                   |                       |                 |                         |              |               |           |            |   |   |   |  |  |
| MEI/D1 | 888         | p          |                          |                  |               |                     |             |                  |             |                 |                  |                        |                         |                          |                    |                 |            |           |           |              |                      |                       |                    |                        |                         |                        |                   |                       |                 |                         |              |               |           |            |   |   |   |  |  |
| MEI/D1 | 893         |            |                          |                  |               |                     |             |                  |             |                 |                  |                        |                         |                          |                    |                 |            |           |           |              |                      |                       |                    | p                      |                         |                        |                   |                       |                 |                         |              |               |           |            |   |   |   |  |  |

**table S2**  
**Kirchmoor**

|         | pollen zone | depta (cm) | Selaginella selaginoides | Dryas octopetala | Salix polaris | Betula nana | Betula alba | Betula pubescens | Pinus sylvestris | Tilia sp. | Potamogeton filiformis | Potamogeton alpinus | Potamogeton berchtoldii | Potamogeton natans | Najas marina | Batrachium | Ceratophyllum demersum | Myriophyllum sp. | Nuphar sp. | Nymphaea sp. | Schoenoplectus lacustris | Typha sp. | Sparganium emersum | Alisma sp. | Eleocharis sp. | Lycopus europaeus | Cicuta virosa | Eupatorium cannabinum | Thelypteris palustris | Carex rostrata | Menyanthes trifoliata | Polygonum lapataifolium | Rumex maritimus | Bidens cernua | Ranunculus scleratus | Urtica dioica | Distichium capillaceum | Sphagnum sp. |   |  |  |  |  |  |  |  |  |  |  |
|---------|-------------|------------|--------------------------|------------------|---------------|-------------|-------------|------------------|------------------|-----------|------------------------|---------------------|-------------------------|--------------------|--------------|------------|------------------------|------------------|------------|--------------|--------------------------|-----------|--------------------|------------|----------------|-------------------|---------------|-----------------------|-----------------------|----------------|-----------------------|-------------------------|-----------------|---------------|----------------------|---------------|------------------------|--------------|---|--|--|--|--|--|--|--|--|--|--|
| postgl. | 324         |            |                          |                  |               |             |             |                  | 1                |           |                        |                     |                         | a                  |              |            |                        |                  | 5          |              | 1                        |           |                    |            |                | 1                 | 1             | p                     |                       |                |                       |                         |                 |               |                      |               |                        |              | 1 |  |  |  |  |  |  |  |  |  |  |
| postgl. | 340         |            |                          |                  |               |             | 3           |                  |                  |           |                        |                     |                         | a                  |              | 2          |                        |                  | 3          |              |                          |           |                    |            |                |                   |               |                       |                       |                |                       |                         |                 |               |                      |               |                        |              |   |  |  |  |  |  |  |  |  |  |  |
| postgl. | 356         |            |                          |                  |               |             | 6           |                  |                  |           |                        |                     |                         | a                  |              | 3          |                        |                  | 1          |              |                          |           |                    |            |                |                   |               |                       |                       |                |                       |                         |                 |               |                      |               |                        |              |   |  |  |  |  |  |  |  |  |  |  |
| postgl. | 380         |            |                          |                  |               |             | 8           |                  |                  |           |                        |                     |                         | a                  |              |            |                        |                  | p          |              |                          | 3         |                    |            |                |                   |               |                       |                       |                |                       |                         |                 |               |                      |               |                        |              |   |  |  |  |  |  |  |  |  |  |  |
| postgl. | 405         |            |                          |                  |               |             | 3           |                  |                  |           |                        |                     |                         | a                  |              |            |                        |                  | 3          |              |                          | 10        |                    |            |                |                   |               |                       |                       |                |                       |                         |                 |               |                      |               |                        |              |   |  |  |  |  |  |  |  |  |  |  |
| postgl. | 431         |            |                          |                  |               |             | 19          | 1                |                  |           |                        | 1                   | 147                     | 114                |              |            |                        |                  | p          |              | 1                        | 75        |                    |            |                |                   | 1             |                       | p                     |                |                       |                         |                 |               |                      |               |                        |              |   |  |  |  |  |  |  |  |  |  |  |
| postgl. | 455         |            |                          |                  |               |             | 60          | 1                |                  |           |                        |                     | 9                       | 5                  | a            | a          |                        | 1                | a          |              | 40                       | 1         | 1                  | 1          | 1              | 4                 |               | p                     |                       |                |                       | 4                       | 16              |               |                      | 4             |                        |              |   |  |  |  |  |  |  |  |  |  |  |
| postgl. | 475         |            |                          |                  |               |             | 71          |                  | 1                |           |                        |                     |                         | 23                 | a            | p          |                        | 1                | a          |              | 69                       | 1         | 6                  | 1          | 2              | 2                 | 1             | 2                     | p                     | 3              |                       | 10                      | 3               |               | 34                   | 5             |                        |              |   |  |  |  |  |  |  |  |  |  |  |
| D3      | 505         | 2          |                          |                  |               |             |             | 26               |                  |           |                        |                     |                         |                    |              |            |                        | p                |            |              |                          |           |                    |            |                |                   |               |                       |                       |                |                       |                         |                 |               |                      |               |                        |              |   |  |  |  |  |  |  |  |  |  |  |
| D3      | 530         |            |                          |                  |               |             | 1           |                  |                  |           |                        |                     |                         |                    |              |            |                        | p                |            |              |                          |           |                    |            |                |                   |               |                       |                       |                |                       |                         |                 |               |                      |               |                        |              |   |  |  |  |  |  |  |  |  |  |  |
| D3      | 555         |            |                          |                  |               |             |             |                  |                  |           |                        |                     |                         |                    |              | 4          |                        | p                |            |              |                          |           |                    |            |                |                   |               |                       |                       |                |                       |                         |                 |               |                      |               |                        |              |   |  |  |  |  |  |  |  |  |  |  |
| D3      | 580         |            |                          |                  |               | 1           | 10          |                  |                  |           |                        |                     |                         |                    |              | 3          |                        | p                |            |              |                          |           |                    |            |                |                   |               |                       |                       |                |                       |                         |                 |               |                      |               |                        |              |   |  |  |  |  |  |  |  |  |  |  |
| AL      | 605         |            |                          |                  |               | 1           | 46          | 12               |                  |           |                        |                     |                         |                    |              | 1          |                        |                  |            |              |                          |           |                    |            |                |                   |               |                       |                       |                | 1                     |                         |                 |               |                      |               |                        |              |   |  |  |  |  |  |  |  |  |  |  |
| MEI/D1  | 630         |            | 4                        | 2                |               |             |             |                  |                  |           |                        | 2                   |                         |                    |              |            |                        |                  |            |              |                          |           |                    |            |                |                   |               |                       |                       |                |                       |                         |                 |               |                      |               |                        |              |   |  |  |  |  |  |  |  |  |  |  |
| MEI/D1  | 638         |            | 1                        |                  | 1             |             |             |                  |                  |           |                        |                     |                         |                    |              |            |                        |                  |            |              |                          |           |                    |            |                |                   |               |                       |                       |                |                       |                         |                 |               |                      |               |                        |              |   |  |  |  |  |  |  |  |  |  |  |
| MEI/D1  | 646         |            |                          |                  |               |             |             |                  |                  |           |                        |                     |                         |                    |              |            |                        |                  |            |              |                          |           |                    |            |                |                   |               |                       |                       |                |                       |                         |                 |               |                      |               |                        |              |   |  |  |  |  |  |  |  |  |  |  |
| MEI/D1  | 655         |            | 1                        | 8                |               |             |             |                  |                  |           |                        |                     |                         |                    |              |            |                        |                  |            |              |                          |           |                    |            |                |                   |               |                       |                       |                |                       |                         |                 |               |                      |               |                        |              |   |  |  |  |  |  |  |  |  |  |  |
| MEI/D1  | 663         |            | 8                        | 9                |               |             |             |                  |                  |           |                        | 5                   |                         |                    |              |            |                        |                  |            |              |                          |           |                    |            |                |                   |               |                       |                       |                |                       |                         |                 |               |                      |               |                        |              |   |  |  |  |  |  |  |  |  |  |  |



**table S5**  
**Stauner Moor**

|        | pollen zone | depth (cm) | Salix polaris | Salix sp. | Dryas octopetala | Hippophae rhamnoides | Betula nana | Juniperus sp. | Betula pubescens | Betula sp. | Betula alba | Populus tremula | Ranunculus aquatilis | Myriophyllum sp. | Potamogeton filiformis | Potamogeton praelongus | Potamogeton obtusifolius | Potamogeton sp. | Najas marina | Najas minor | Nymphaea sp. | Characeae | Carex sp. | Eleocharis | Menyanthes sp. | Typha sp. | Caryophyllaceae |
|--------|-------------|------------|---------------|-----------|------------------|----------------------|-------------|---------------|------------------|------------|-------------|-----------------|----------------------|------------------|------------------------|------------------------|--------------------------|-----------------|--------------|-------------|--------------|-----------|-----------|------------|----------------|-----------|-----------------|
| BO     |             | 420        |               |           |                  |                      |             |               |                  |            |             |                 |                      |                  |                        |                        |                          |                 |              |             |              |           |           |            |                |           |                 |
| BO     |             | 430        |               |           |                  |                      |             |               |                  |            | x           |                 |                      |                  |                        |                        |                          |                 |              |             |              |           | x         |            | x              |           |                 |
| BO     |             | 440        |               |           |                  |                      |             |               |                  |            |             |                 |                      |                  |                        |                        |                          |                 |              |             |              |           |           |            |                |           |                 |
| BO     |             | 450        |               |           |                  |                      |             |               |                  |            |             |                 |                      |                  |                        |                        |                          |                 |              |             |              |           |           |            |                |           |                 |
| BO     |             | 460        |               |           |                  |                      |             |               |                  |            |             |                 |                      |                  |                        |                        |                          |                 |              |             |              |           |           |            |                |           |                 |
| BO     |             | 470        |               |           |                  |                      |             |               |                  |            |             |                 |                      |                  |                        |                        |                          |                 | x            | x           |              |           | x         | x          |                |           |                 |
| BO     |             | 480        |               |           |                  |                      |             |               |                  |            |             |                 |                      |                  |                        |                        |                          |                 | x            | x           |              |           | x         |            | x              |           |                 |
| BO     |             | 490        | x             |           |                  |                      |             |               |                  | x          |             |                 |                      |                  |                        | x                      |                          |                 | x            | x           |              |           | x         |            |                |           |                 |
| BO     |             | 500        |               |           |                  |                      |             | x             | x                | x          |             |                 |                      |                  |                        | x                      | x                        |                 | x            | x           | x            |           | x         | x          |                |           |                 |
| BO     |             | 510        |               |           |                  |                      |             | x             |                  |            | x           |                 |                      |                  |                        | x                      |                          |                 | x            | x           | x            |           | x         | x          |                |           |                 |
| PB     |             | 520        |               |           |                  |                      |             |               |                  |            | x           |                 |                      |                  |                        |                        |                          |                 |              |             |              |           | x         |            |                |           |                 |
| PB     |             | 530        |               |           |                  |                      |             | x             |                  | x          |             |                 |                      |                  |                        |                        |                          |                 | x            |             |              |           |           |            |                |           |                 |
| PB     |             | 540        |               |           |                  |                      |             | x             |                  | x          |             |                 |                      |                  |                        |                        |                          |                 |              |             |              |           |           |            |                | x         |                 |
| PB     |             | 550        |               |           |                  |                      |             | x             |                  | x          | x           |                 |                      |                  |                        |                        |                          |                 |              |             | x            |           |           |            |                |           |                 |
| PB     |             | 560        |               |           |                  |                      |             | x             |                  | x          |             |                 |                      |                  |                        |                        |                          |                 |              |             |              |           |           |            |                |           |                 |
| PB     |             | 570        | x             |           |                  |                      |             | x             |                  | x          |             |                 |                      |                  |                        |                        |                          |                 |              |             |              |           |           |            |                |           |                 |
| PB     |             | 580        |               |           |                  |                      |             | x             |                  |            |             | x               |                      |                  |                        |                        |                          | x               |              |             |              |           |           |            |                |           |                 |
| D3     |             | 590        |               |           |                  | x                    |             |               | x                | x          |             |                 |                      |                  |                        |                        |                          |                 |              |             |              |           |           |            |                |           |                 |
| D3     |             | 600        |               |           |                  | x                    |             | x             |                  |            |             |                 |                      |                  |                        |                        |                          |                 |              |             |              |           |           |            |                |           |                 |
| D3     |             | 610        |               |           |                  |                      |             |               |                  |            |             |                 |                      |                  |                        |                        |                          |                 |              |             |              |           |           |            |                |           |                 |
| D3     |             | 620        |               |           |                  |                      |             |               |                  |            |             |                 |                      |                  |                        |                        |                          |                 |              |             |              |           |           |            |                |           |                 |
| D3     |             | 630        | x             |           |                  | x                    |             |               |                  |            | x           |                 | x                    |                  |                        |                        |                          |                 |              |             |              |           | x         |            |                |           |                 |
| D3     |             | 640        |               |           |                  | x                    | x           | x             |                  |            |             |                 | x                    |                  |                        |                        |                          |                 |              |             |              |           | x         |            |                |           |                 |
| D3     |             | 650        |               |           |                  | x                    |             |               |                  |            |             |                 | x                    |                  |                        |                        |                          |                 |              |             |              |           |           |            |                |           |                 |
| D3     |             | 660        | x             |           |                  | x                    |             |               |                  |            |             |                 | x                    |                  |                        |                        |                          |                 |              |             |              |           | x         |            |                |           |                 |
| D3     |             | 670        |               |           |                  | x                    |             | x             |                  |            |             |                 |                      |                  |                        |                        |                          |                 |              |             |              |           |           |            |                |           |                 |
| D3     |             | 680        |               |           |                  | x                    |             |               |                  |            | x           |                 | x                    |                  |                        |                        |                          |                 |              |             |              |           |           |            |                |           |                 |
| D3     |             | 690        |               |           |                  |                      |             | x             |                  | x          |             |                 |                      |                  |                        |                        |                          |                 |              |             |              |           |           |            |                |           |                 |
| AL     |             | 700        |               |           |                  |                      |             |               | x                | x          |             | x               | x                    |                  | x                      |                        | x                        |                 |              |             |              |           |           |            |                |           |                 |
| AL     |             | 710        |               |           |                  |                      |             | x             | x                | x          | x           | x               |                      |                  | x                      |                        | x                        |                 |              |             |              |           |           |            |                |           |                 |
| AL     |             | 720        |               |           |                  |                      |             | x             |                  | x          |             |                 |                      |                  |                        |                        |                          |                 |              |             |              |           | x         |            |                |           |                 |
| AL     |             | 730        |               | x         |                  | x                    |             | x             |                  |            |             |                 |                      |                  |                        |                        |                          |                 |              |             |              |           |           |            |                |           |                 |
| MEI/D1 |             | 740        |               | x         | x                | x                    |             |               |                  |            |             |                 |                      | x                | x                      | x                      |                          | x               |              |             |              |           | x         |            | x              |           |                 |
| MEI/D1 |             | 750        | x             |           |                  | x                    | x           |               |                  |            |             |                 |                      |                  | x                      |                        |                          |                 |              |             |              |           |           |            |                |           |                 |
| MEI/D1 |             | 760        | x             |           | x                | x                    |             |               |                  |            |             |                 |                      |                  | x                      |                        |                          |                 |              |             |              |           |           |            |                |           | x               |

**table S6**

| species        | fallspeed | ppe  | PPE.errors |
|----------------|-----------|------|------------|
| Betula         | 0,024     | 3    | 0,30       |
| Picea          | 0,056     | 0,5  | 0,05       |
| Pinus          | 0,031     | 2    | 0,20       |
| Artemisia      | 0,025     | 1    | 0,10       |
| Calluna        | 0,038     | 0,5  | 0,05       |
| Cyperaceae     | 0,035     | 0,3  | 0,03       |
| Plantago       | 0,029     | 0,25 | 0,03       |
| Rumex acetosa  | 0,018     | 0,25 | 0,03       |
| Poaceae        | 0,035     | 1    | 0,10       |
| Helianthemum   | 0,043     | 0,1  | 0,01       |
| Hippophae      | 0,029     | 0,2  | 0,02       |
| Salix          | 0,022     | 0,8  | 0,08       |
| Filipendula    | 0,02      | 0,5  | 0,05       |
| Betula nana    | 0,022     | 0,75 | 0,08       |
| Juniperus      | 0,019     | 0,5  | 0,05       |
| Empetrum       | 0,038     | 0,6  | 0,06       |
| Potentilla     | 0,024     | 0,2  | 0,02       |
| Chenopodiaceae | 0,025     | 0,8  | 0,08       |
| Ranunculus     | 0,023     | 0,2  | 0,02       |
| Thalictrum     | 0,023     | 0,5  | 0,05       |
| Galium         | 0,02      | 0,1  | 0,01       |

### Migration of *Betula* species into the study area

The article gives special reference to *Betula pubescens*. However, in the course of the Lateglacial and the Early Holocene the migration of different *Betula* species occurred. These different *Betula* species had different shares in the composition of the vegetation on a diachronic scale. Thus, when focusing on *Betula pubescens* only, it is important to distinguish between the different present *Betula* species in the region. Palynologically this is either hardly possible (e.g. between *B. pubescens* and *B. pendula*) or often not performed (*B. pubescens* and *B. nana*). It follows that pollen studies of the Lateglacial and early Holocene in Schleswig-Holstein mainly only classify *Betula* pollen on genus level. As a further complication, different species names and name renewals for different *Betula* species occur in the literature.

*Betula* species that are proven to be present during the Lateglacial and Early Holocene based on macrofossil data across the study region are dwarf birch (*Betula nana*), downy birch (*B. pubescens*) and silver birch (*B. pendula*). However, the migration of the latter occurred most probably exclusively in the course of the early Holocene (Krüger et al., 2020; Usinger, 1981b, a; Usinger and Wolf, 1982). *Betula pubescens* ssp. *tortuosa* that is recorded in different datasets can be regarded as resulting from hybridisation between *B. pubescens* and *B. nana* (Karlsson and Weih, 1996). Furthermore, works of Schütrumpf (1937, 1943, 1955) in the focus area document finds of *B. verrucosa* – a synonymous species name for *B. pendula*, which only expanded in the area from the Preboreal period onwards as a result of increasing temperature. The earliest proven presence of *Betula pubescens* of the Lateglacial in the Nahe palaeolake record dates to 13.770 cal BP (Krüger et al., 2020) and, hence, 2000 years prior to the period of investigation.

To conclude: *Betula pubescens* is present in the study area prior to the studied time interval and remains being present until today. *Betula nana* is present in the study area since shortly after deglaciation, throughout the Lateglacial and into the early Holocene. *Betula pendula* is present in the study area only by the beginning of the Holocene but the timing of its first appearance in the Early Holocene is unknown.

**supplementary figures**

The pictures are taken in growth favoring locations for *Betula pubescens* in different places of southern Greenland (see 3.1 Fieldwork) by the author. They underline how stands of *Betula pubescens* could have formed a barrier in the landscape and illustrate the predominantly occurring multi-branched growth-form in *Betula pubescens* stands.

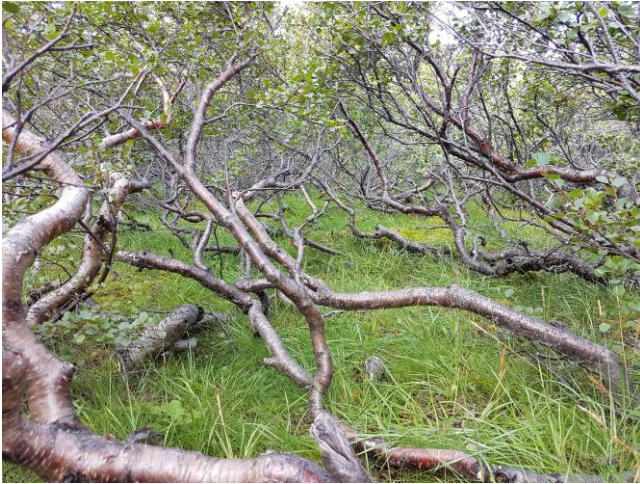

figure S1

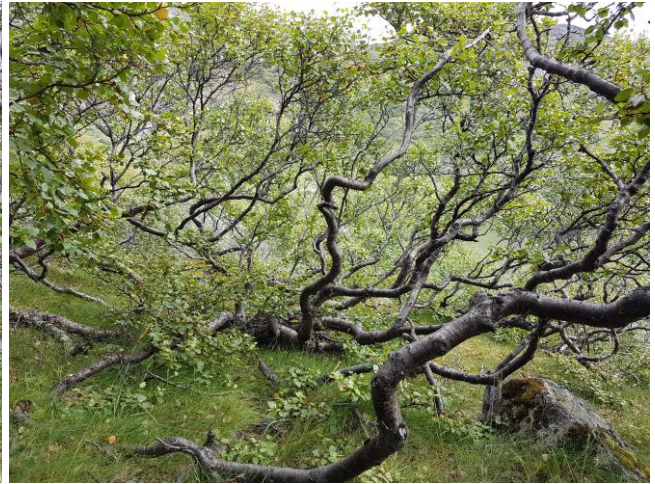

figure S2

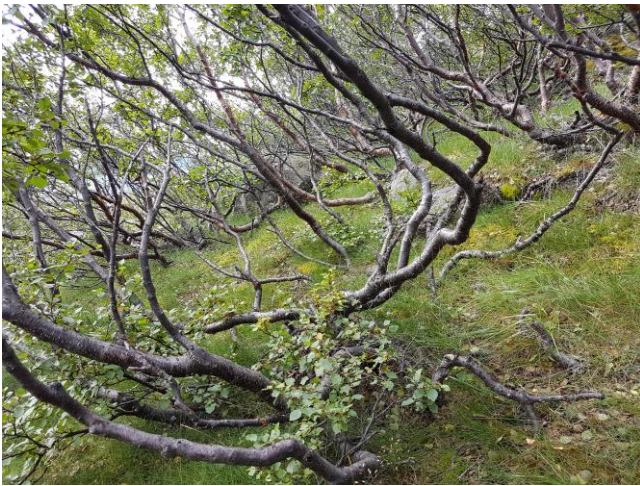

figure S3

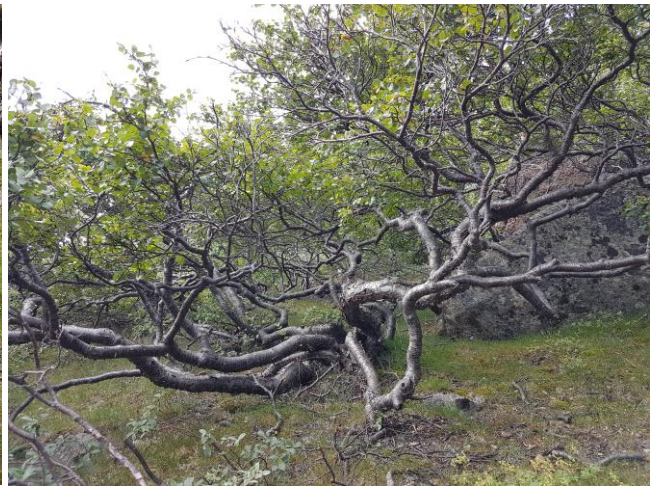

figure S4
